# Supplementary material for: The structure modification and activity improvement of Pd–Co/C electrocatalysts by the addition of Au for the oxygen reduction reaction
Source: Royal Society of Chemistry journal article supplement (doi:10.1039/c2cy20136d), 2012-01-01
Supplement: c2cy20136d.pdf [file c2cy20136d.pdf]

## Supporting information

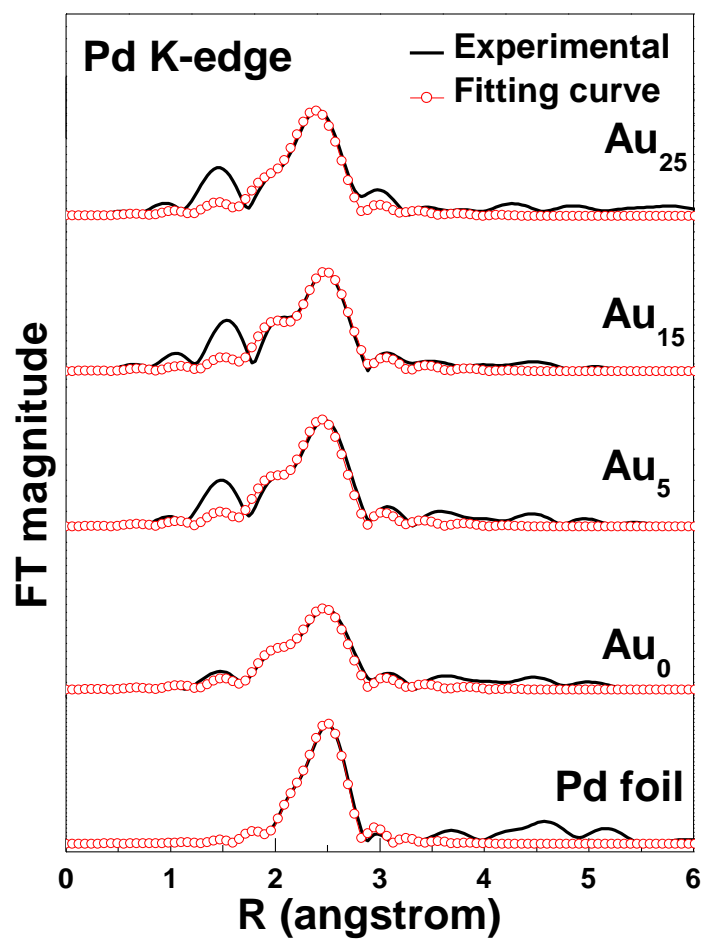

**Figure S1** Best fitting curves of the Pd foil and various alloy catalysts obtained from the analysis of Pd K edge in EXAFS spectra.

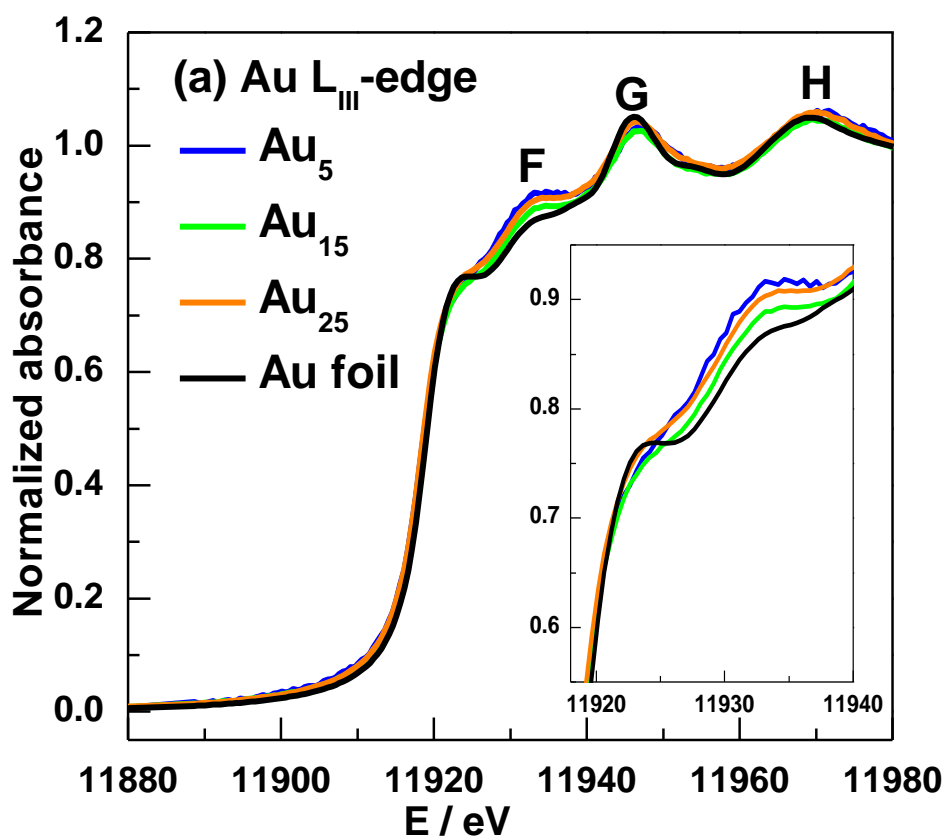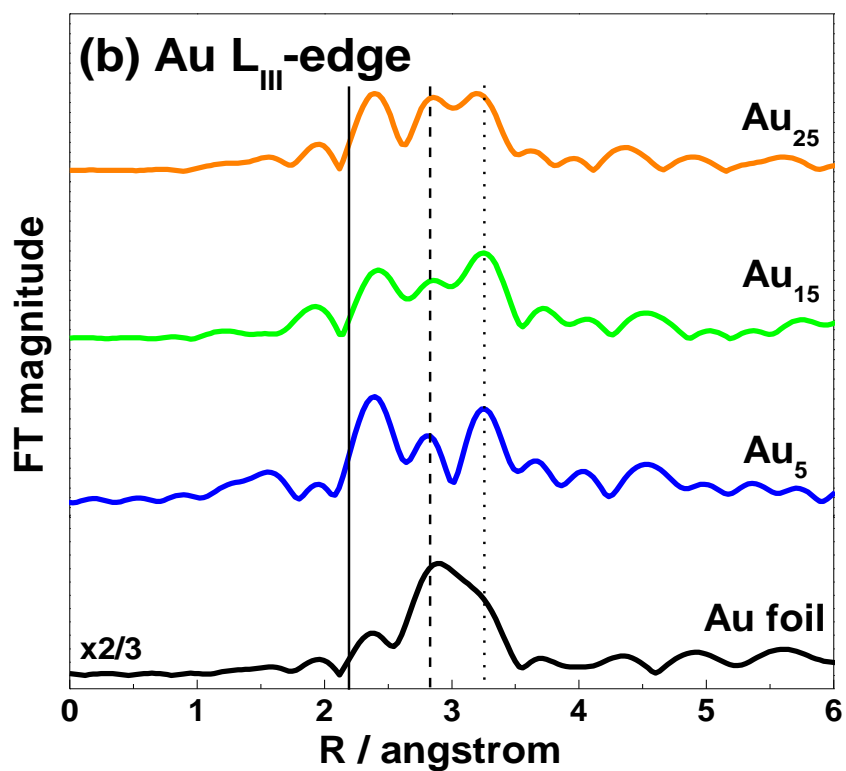

**Figure S2** (a) XANES and (b) EXAFS spectra of the Au foil and various alloy catalysts for Au L<sub>III</sub>-edge.

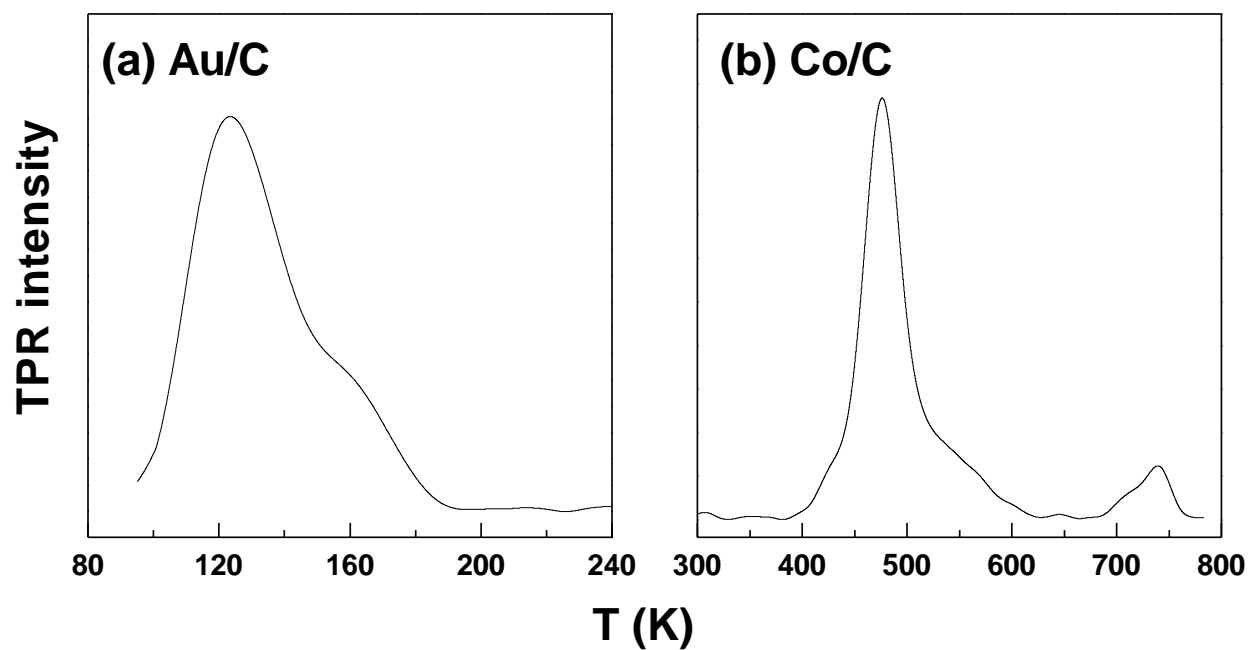

**Figure S3** TPR traces of the Au/C and Co/C catalysts.
